# Supplementary material for: IL-8 Released from Human Pancreatic Cancer and Tumor-Associated Stromal Cells Signals through a CXCR2-ERK1/2 Axis to Induce Muscle Atrophy
Source: MDPI journal article supplement (doi:10.3390/cancers11121863), 2019-11-25
Supplement: s1 [file s1]

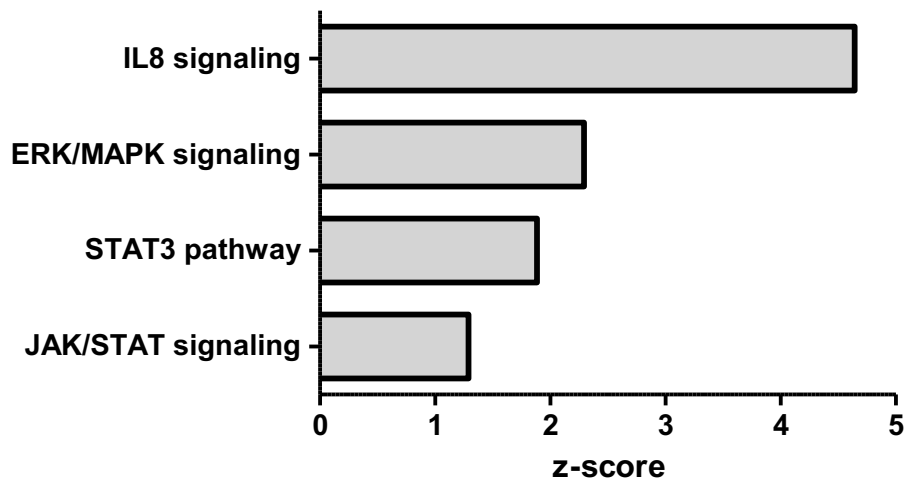

**Supplemental Figure 1. IL8-related canonical pathways enriched in the skeletal muscle transcriptome of PDAC patients.** Ingenuity Pathway Analysis of a recently published microarray from our lab [30] comparing the skeletal muscle transcriptome of PDAC patients and non-cancer controls reveals significant activation of *IL8 Signaling* (z-score = 4.642,  $P < 0.0001$ ) in cachectic PDAC patients. In addition, activated pathways identified in IL8-treated C2C12 myotubes also appear to be activated in the skeletal muscle of cachectic PDAC patients. These pathways include *ERK/MAPK signaling* (z-score = 2.294,  $P < 0.001$ ), *STAT3 pathway* (z-score = 1.886,  $P < 0.0001$ ), and *JAK/STAT signaling* (z-score = 1.291,  $P < 0.0001$ ).
