# Supplementary material for: IL-8 Released from Human Pancreatic Cancer and Tumor-Associated Stromal Cells Signals through a CXCR2-ERK1/2 Axis to Induce Muscle Atrophy
Source: Cancers (Basel). 2019 Nov 25;11(12):1863. doi: 10.3390/cancers11121863 (PMC6966692; doi:10.3390/cancers11121863)
Supplement: Supplementary file 1 [file cancers-11-01863-s001.zip › Final CANCERS submission supplemental/Supplementary Table 1.xlsx]

## Sheet: Sheet1
Supplementary Table 1.
	L3.6pl cell			PPC Cell						PTAS Cell
	CM	+ PTAS cell co-culture		CM	+ PTAS cell co-culture		+ 10% PTAS cell CM	+ 50% PTAS cell CM		CM	+ 10% PPC cell CM	+ 50% PPC cell CM
EGF	16.71	5062		6909	3685		5810	5240		4337	4578	3845
MCP-1	183.8	3582		1396	5486		3390	6809		4951	5239	5513
IL-8	1498	2940		625.54	6071		573.27	650.13		70.94	1335	7118
CXCL1	1369	675.2		560.92	523.04		430.64	491.86		18.65	854.16	2567
GM-CSF	4.95	8.84		29.31	10.21		23.41	25.51		n.d.	59.99	161.61
Fractalkine	110.95	95.23		78.97	85.78		78.97	83.83		31.6	118.77	192.24
VEGF	2229	192.01		112.77	69.68		110.38	154.72		47.78	112.14	202.7
TGF-a	n.d.	178.49		45.92	5.87		35.84	40.95		n.d.	12.18	41.91
IL-6	n.d.	1403		23.06	2064		37.45	122		70.21	663.76	954.43
IP-10	7.21	7.39		6.05	63.56		3.64	4.87		2.4	73.58	280.81
IL-1a	8.71	4.76		n.d.	n.d.		n.d.	1.49		n.d.	5.35	21.18
IL-4	2.71	3.27		16.03	3.27		14.03	15.02		n.d.	7.27	27.18
TNFa	n.d.	n.d.		n.d.	n.d.		n.d.	n.d.		n.d.	6.89	23.87
Eotaxin	10.55	5.43		6.86	19.82		3.63	8.93		5.91	19.15	7.57
IL-1RA	n.d.	6.81		6.76	4.16		6.3	10.25		5.19	5.72	6.81
IFNg	n.d.	n.d.		1.47	6.55		1.47	1.9		n.d.	n.d.	n.d.
IL-13	n.d.	2.63		n.d.	5.03		2.63	6.3		6.41	6.94	3.8
MCP-3	n.d.	60.05		7.38	84.02		11.97	64.71		110.34	210.74	98.97
G-CSF	22.98	39.47		7.4	32.03		n.d.	2.61		11.64	36.83	38.42
FGF-2	n.d.	124.52		9.55	20.29		21.12	9.55		n.d.	n.d.	322.28
IL-10	n.d.	4.16		22.88	17.28		21.9	45.74		2.41	16.12	45.49
IL-7	2.82	13.54		4.13	13.68		n.d.	2.98		n.d.	6.53	9.46
IFNa2	18.07	5.79		2.27	5.31		1.43	1.9		n.d.	3.06	5.79
IL-1b	n.d.	3.55		n.d.	3.92		n.d.	n.d.		n.d.	2.16	n.d.
Flt-3L	n.d.	2.3		n.d.	3.52		2.23	4.9		n.d.	4.73	2.3
IL-12p40	n.d.	5.34		2.19	2.95		4.61	7.13		2.24	3.45	3.71
MDC	n.d.	n.d.		4.09	n.d.		9.34	12.84		n.d.	n.d.	18.64
MIP-1a	n.d.	n.d.		n.d.	n.d.		n.d.	n.d.		n.d.	n.d.	4.34
PPC: Primary Pancreatic Cancer Cell
PTAS: Primary Tumor Associated Stromal Cell
CM: Conditioned Media
all values are pg/ml
Cytokines/Chemokines below the detection threshold: IL-2, IL-3, IL-5, IL-9, IL12p70, IL-15, IL-17A, MIP1b, PDGF-AA, PDGF-AB/BB, RANTES, sCD40L, TNFb
