# Supplementary figures and images for: IL-8 Released from Human Pancreatic Cancer and Tumor-Associated Stromal Cells Signals through a CXCR2-ERK1/2 Axis to Induce Muscle Atrophy
Source: MDPI journal article supplement (doi:10.3390/cancers11121863), 2019-11-25

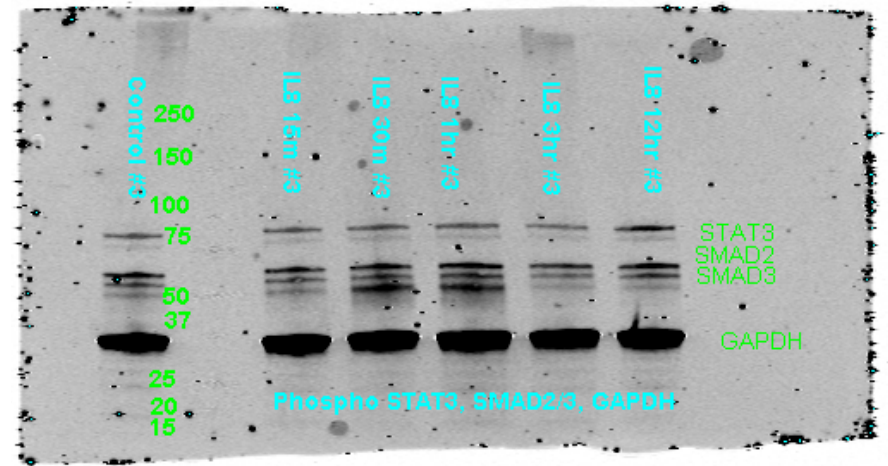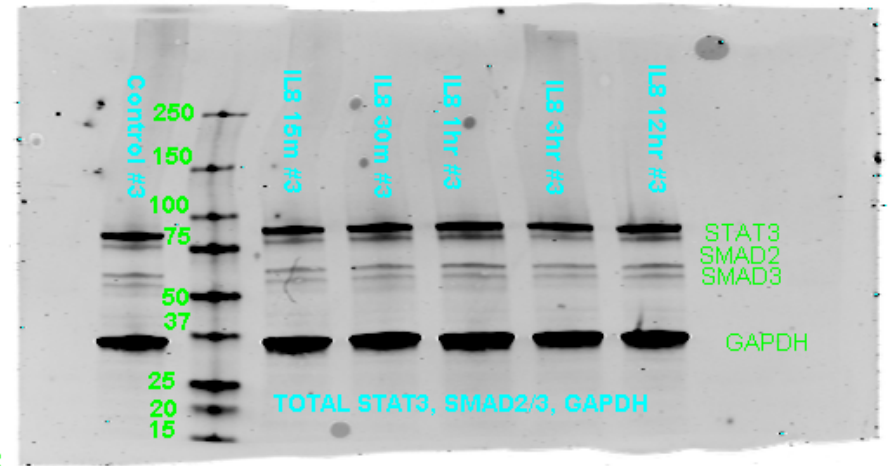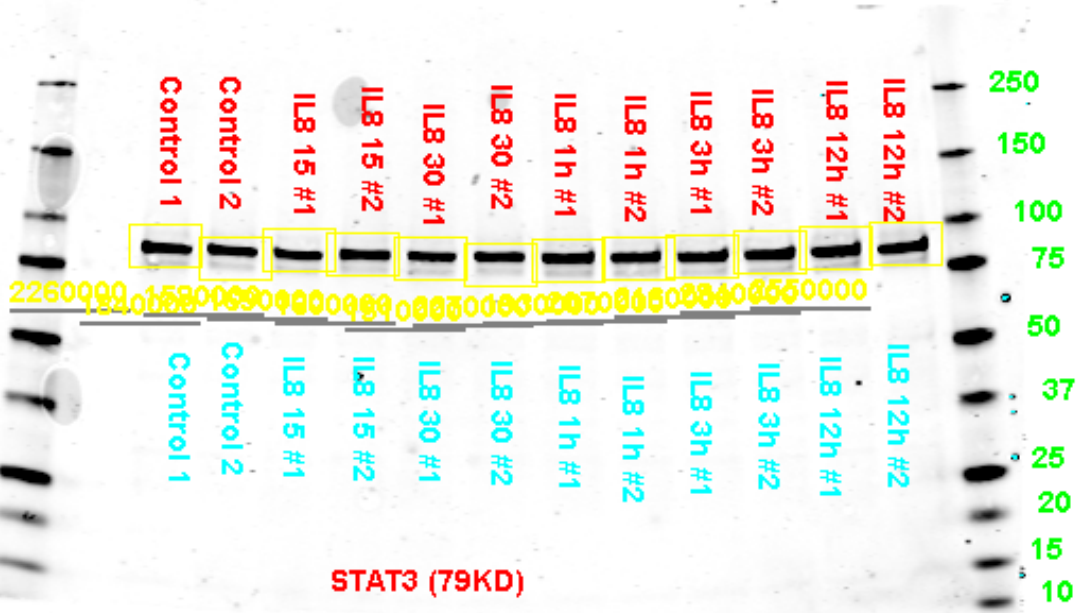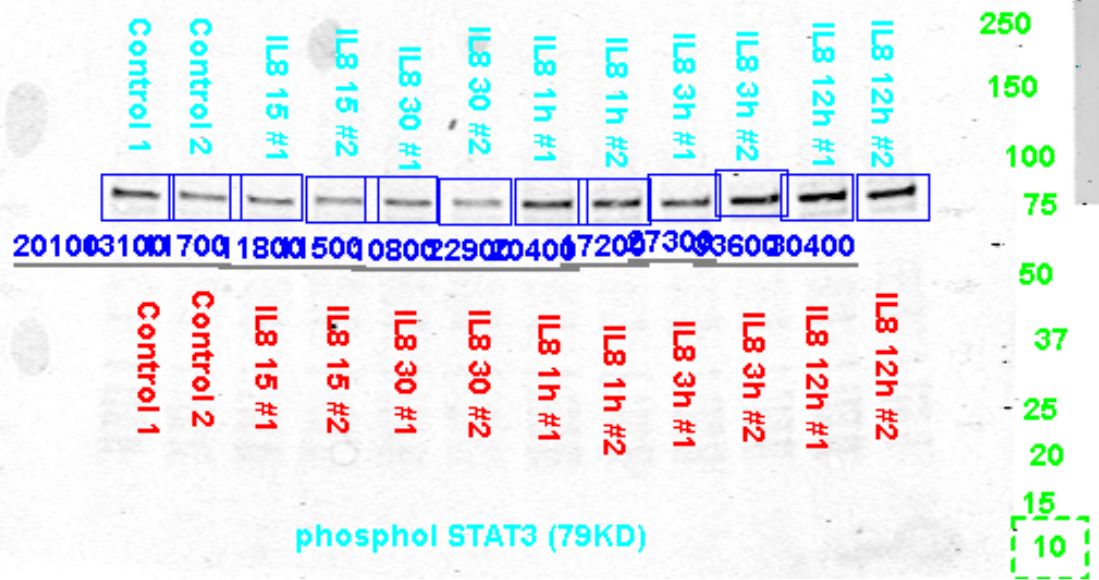

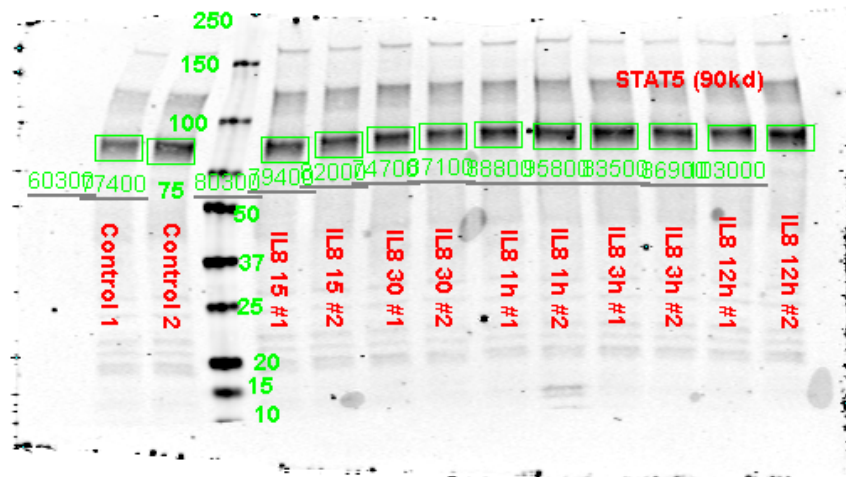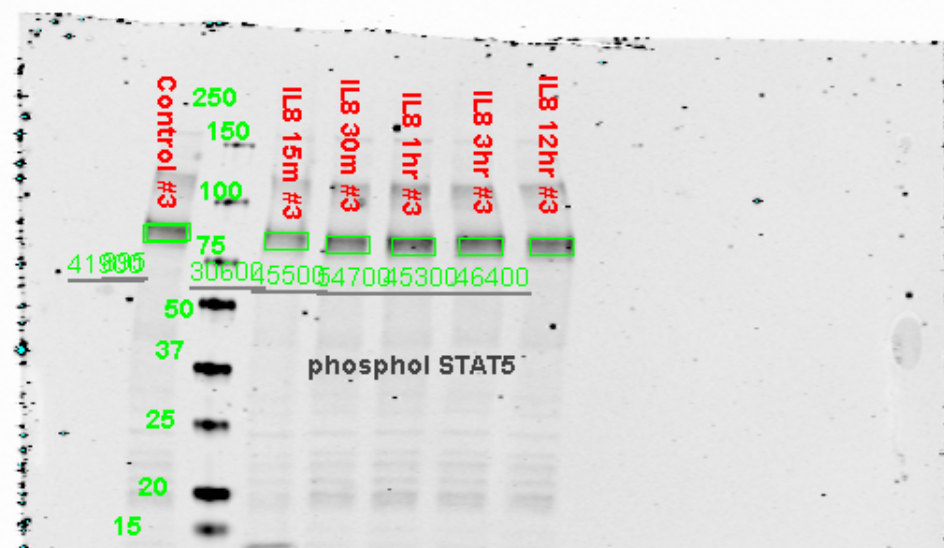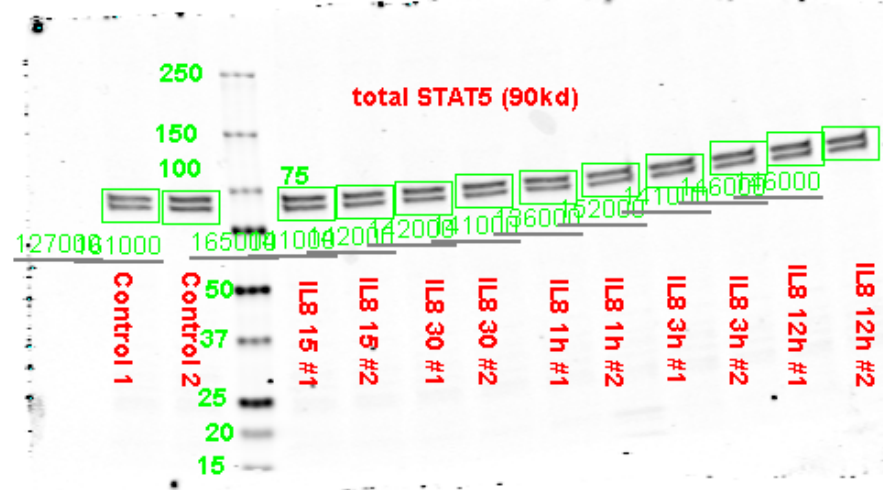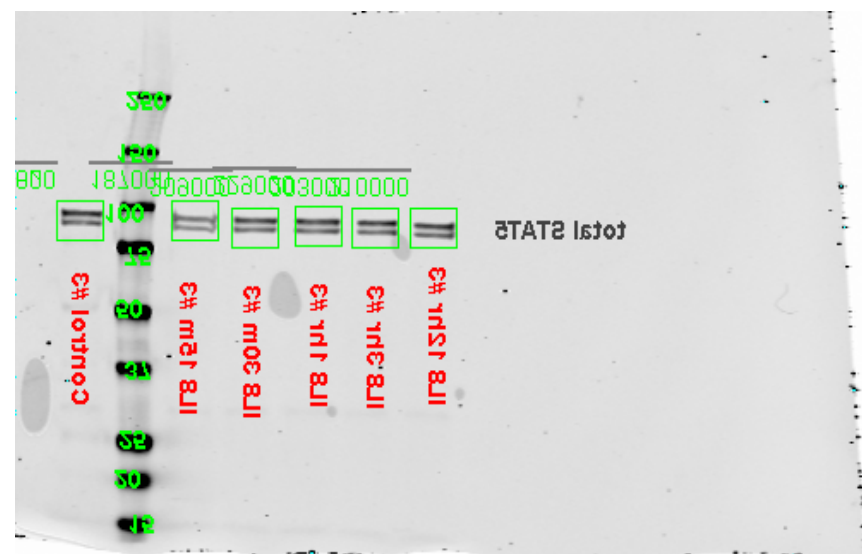

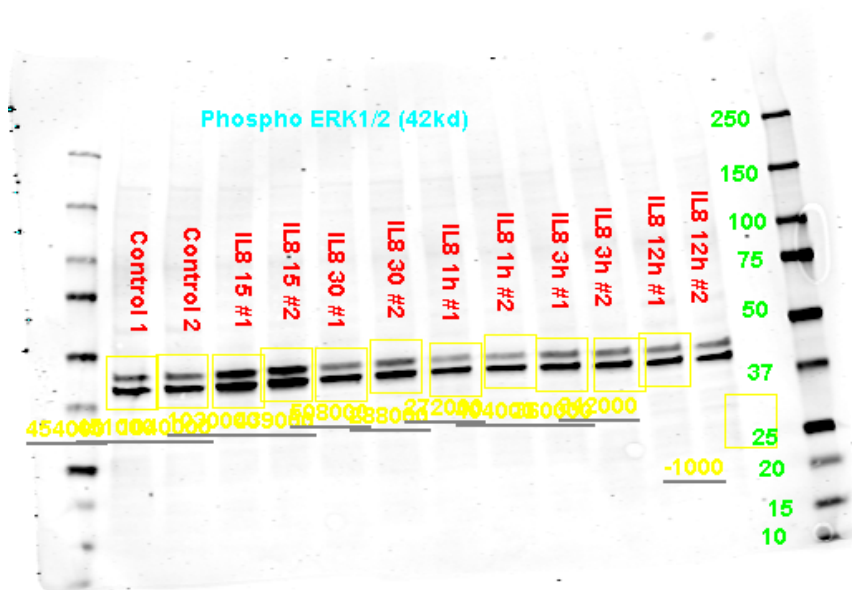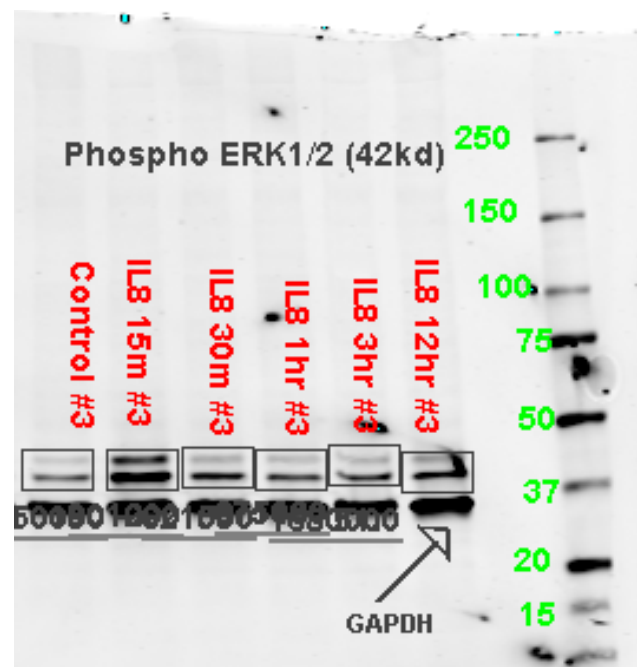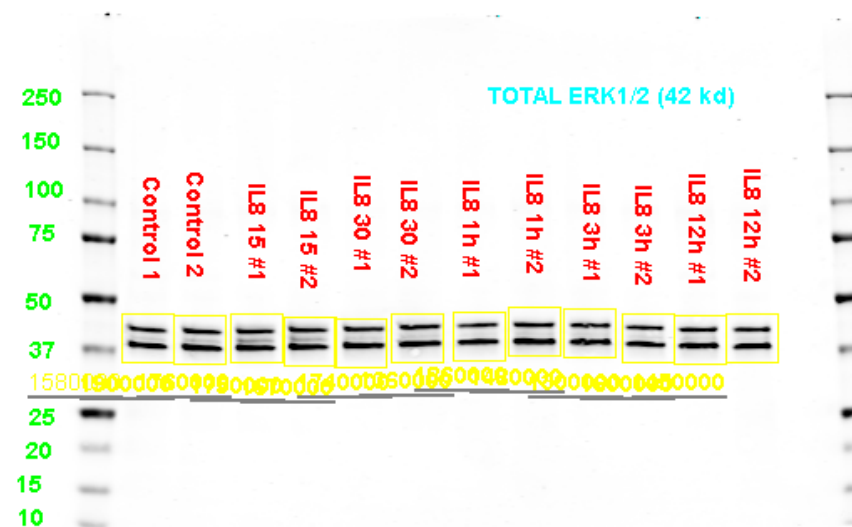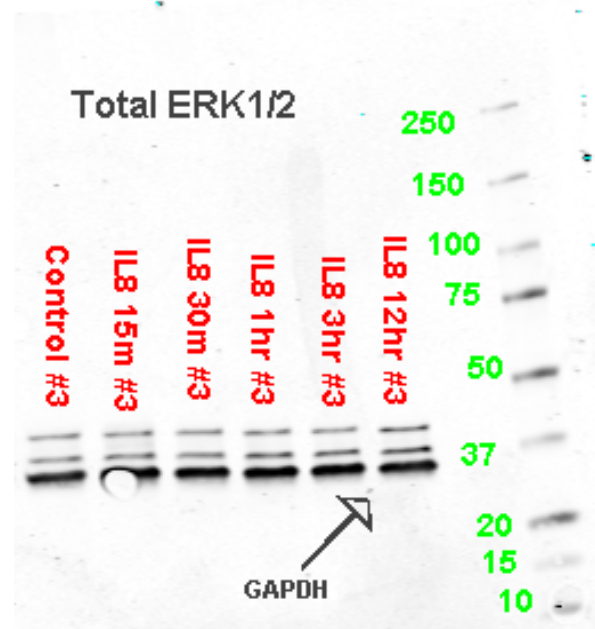

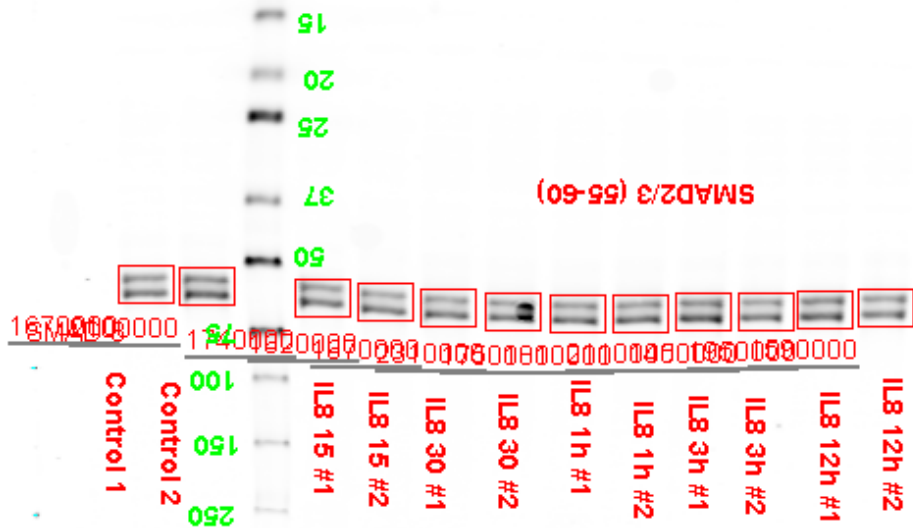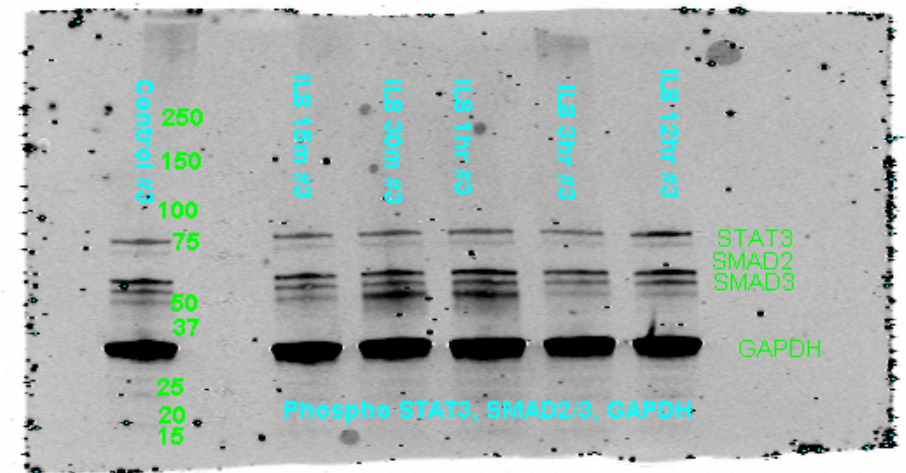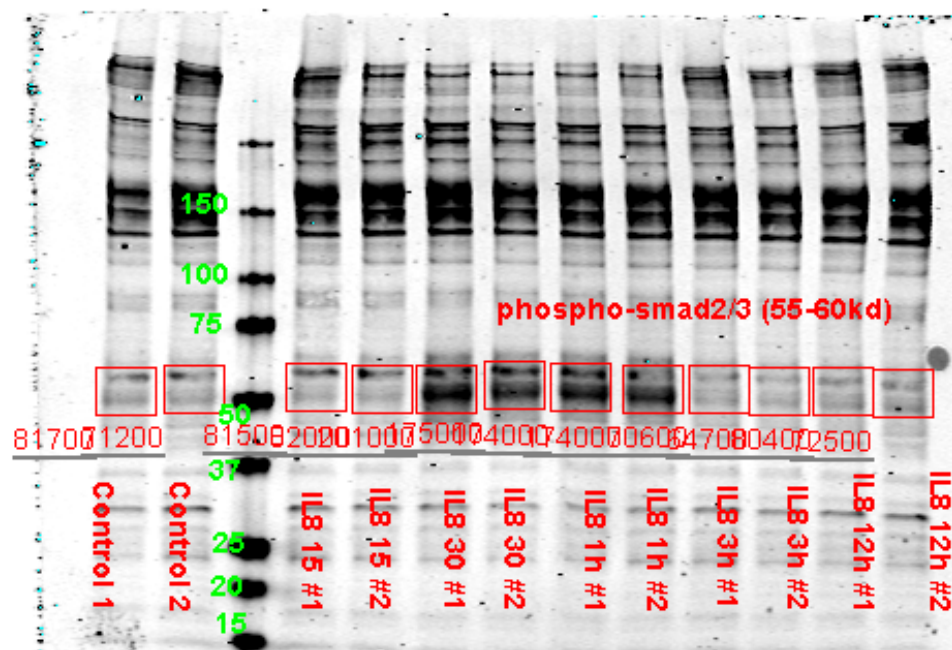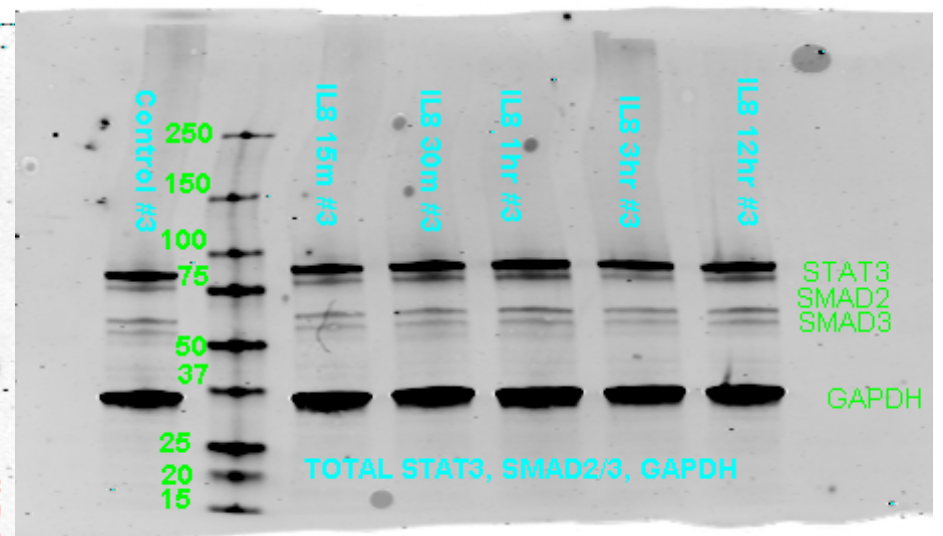



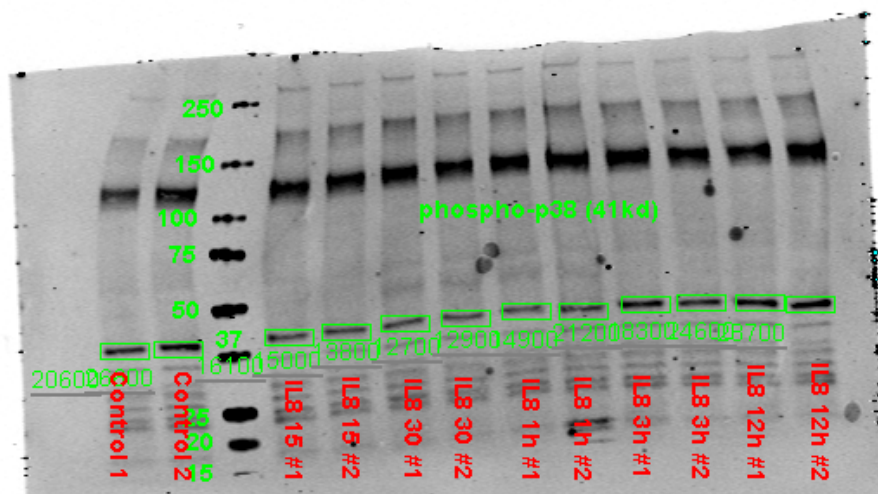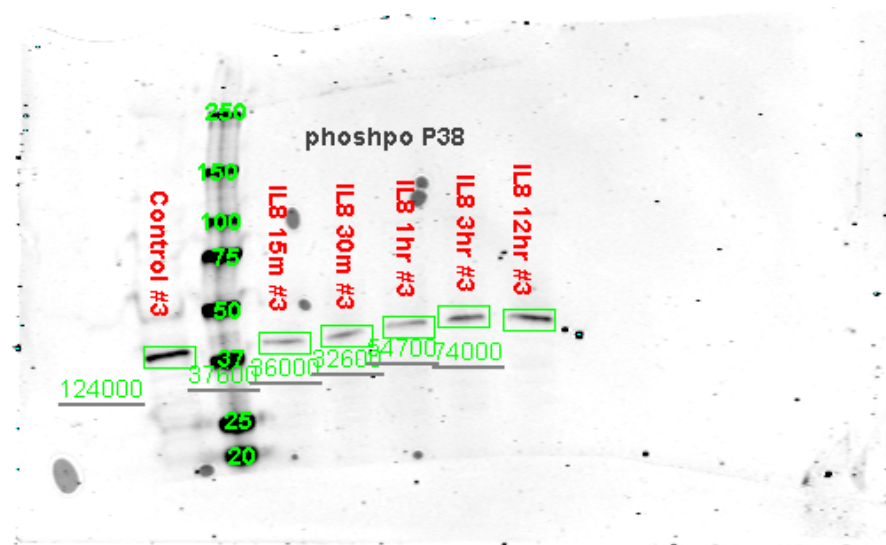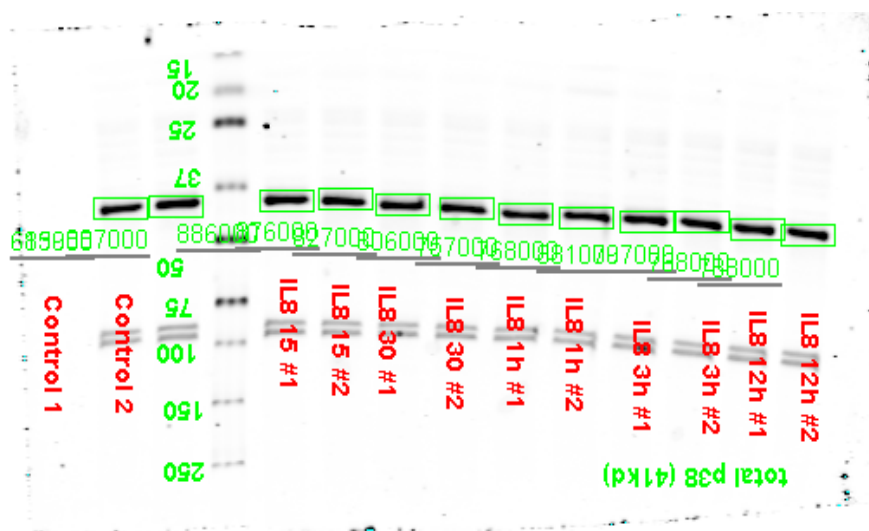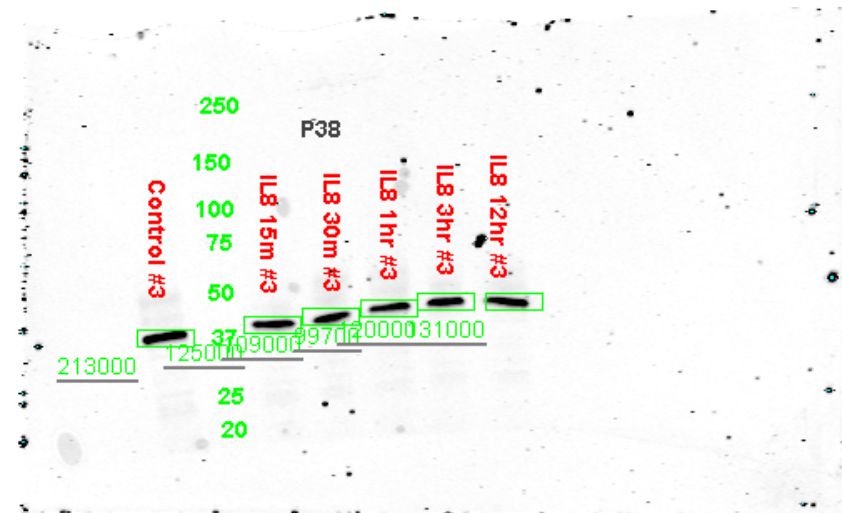

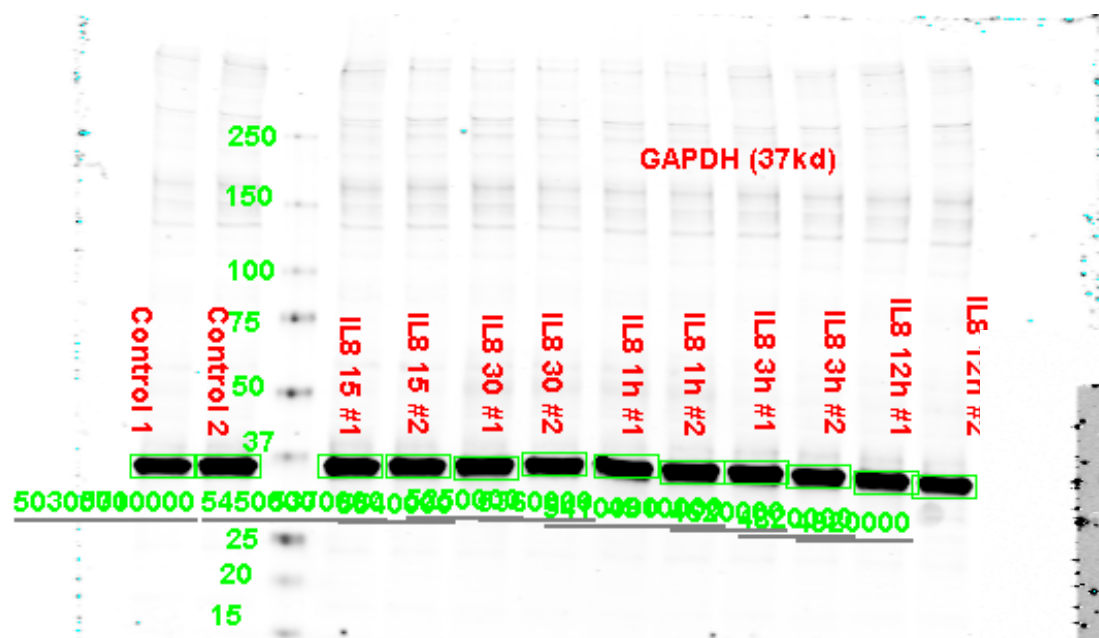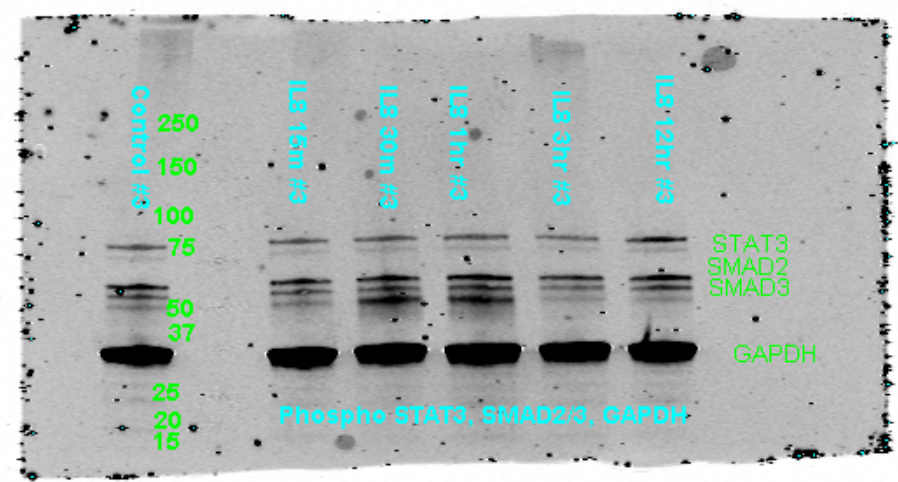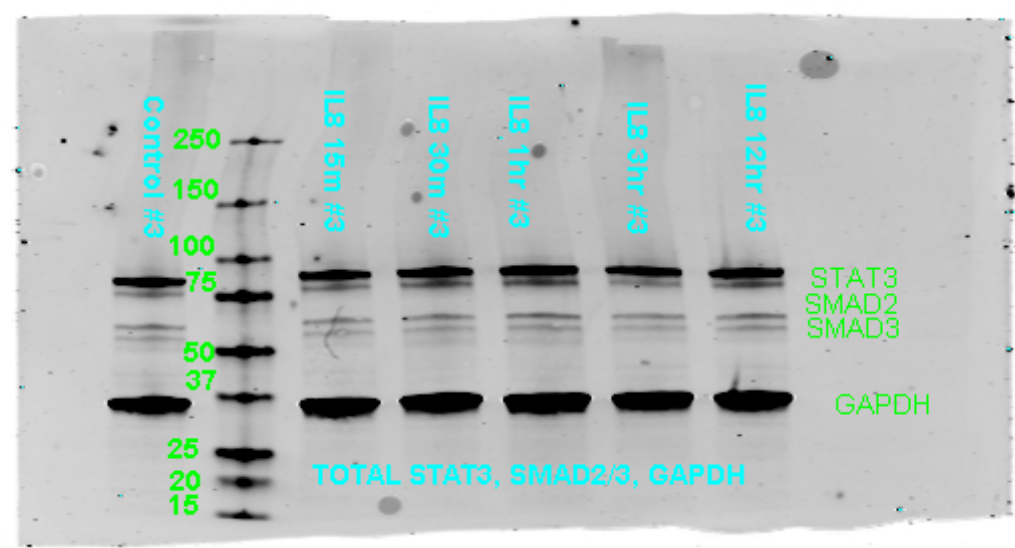

Supplement: s1 [file s1]
